# Supplementary material for: The Effect of Primary and Middle School Teachers’ Problematic Internet Use and Fear of COVID-19 on Psychological Need Thwarting of Online Teaching and Psychological Distress
Source: Healthcare (Basel). 2021 Sep 11;9(9):1199. doi: 10.3390/healthcare9091199 (PMC8466317; doi:10.3390/healthcare9091199)
Supplement: Supplementary file 1 [file healthcare-09-01199-s001.zip › healthcare-1307049-SI.pdf]

## Supplementary Materials

**Table S1.** Exploratory factor analysis (EFA) for the Psychological Need Thwarting of Online Teaching Scale (n=4488), including a comparison with the original items from the Chinese Psychological Need Thwarting of Teachers Scale.

| Original Item: Chinese Psychological Need Thwarting of Teachers Scale                                                   | Revised Item: Psychological Need Thwarting of Online Teaching Scale                                                             | Factor Loadings after Promax Rotation |              |              |
|-------------------------------------------------------------------------------------------------------------------------|---------------------------------------------------------------------------------------------------------------------------------|---------------------------------------|--------------|--------------|
|                                                                                                                         |                                                                                                                                 | Relatedness                           | Competence   | Autonomy     |
| I feel disconnected from the people around me in my work environment.                                                   | 9. I feel disconnected from other colleagues and leaders when teaching online during the pandemic.                              | <b>0.755</b>                          | 0.079        | 0.020        |
| I feel that people in my work environment are indifferent to me.                                                        | 10. I do not feel that my colleagues and leaders care about me when teaching online during the pandemic.                        | <b>0.701</b>                          | 0.182        | -0.033       |
| I feel that people around me are jealous of me when I am successful.                                                    | 11. I feel that my colleagues and leaders are jealous of me when I achieve good results in online teaching during the pandemic. | <b>0.931</b>                          | -0.139       | -0.011       |
| I feel that people at school do not like me.                                                                            | 12. I feel that my colleagues and leaders do not like me when I conduct online teaching during the pandemic.                    | <b>0.948</b>                          | -0.152       | -0.003       |
| There are situations that make me feel incapable in my daily work environment.                                          | 5. There are some online teaching situations that make me feel incapable in my daily work environment during the pandemic.      | -0.065                                | <b>0.795</b> | 0.119        |
| Sometimes I talk about the things that make me feel incompetent.                                                        | 6. I sometimes talk about the things that make me feel powerless to do my online teaching job during the pandemic.              | -0.016                                | <b>0.889</b> | -0.004       |
| In my daily work, some situations make me feel powerless.                                                               | 7. Online teaching during the pandemic sometimes makes me feel powerless.                                                       | 0.027                                 | <b>0.916</b> | -0.064       |
| I feel that I am not capable of performing daily tasks due to the lack of opportunities for practice in my environment. | 8. Due to the lack of training opportunities in my environment, I feel that I am capable of performing online teaching tasks.   | 0.456                                 | <b>0.532</b> | 0.071        |
| I cannot decide for myself how I want to teach.                                                                         | 1. In online courses during the pandemic, I cannot decide for myself how I want to teach.                                       | 0.082                                 | 0.070        | <b>0.519</b> |
| There is pressure to behave in a certain way in my                                                                      | 2. In online teaching work during the pandemic, I feel                                                                          | 0.022                                 | 0.100        | <b>0.611</b> |

|                                                                                                   |                                                                                                                                       |        |        |              |
|---------------------------------------------------------------------------------------------------|---------------------------------------------------------------------------------------------------------------------------------------|--------|--------|--------------|
| daily work.                                                                                       | there is pressure that affects my behavior and requires me to comply in a certain way.                                                |        |        |              |
| I have to follow a certain prescribed teaching style.                                             | 3. I have to follow a prescribed online teaching style during the pandemic.                                                           | -0.066 | -0.126 | <b>0.822</b> |
| I feel pressure from external environment that limits me in choosing a particular teaching style. | 4. During the pandemic, I feel pressure from the external environment that limited me in choosing a particular online teaching style. | 0.008  | 0.078  | <b>0.727</b> |
|                                                                                                   | <b>Eigenvalues</b>                                                                                                                    | 4.954  | 2.349  | 1.065        |
|                                                                                                   | <b>Percentage Variance</b>                                                                                                            | 0.246  | 0.201  | 0.158        |
|                                                                                                   | <b>Cumulative Percentage Variance</b>                                                                                                 | 0.246  | 0.447  | 0.605        |

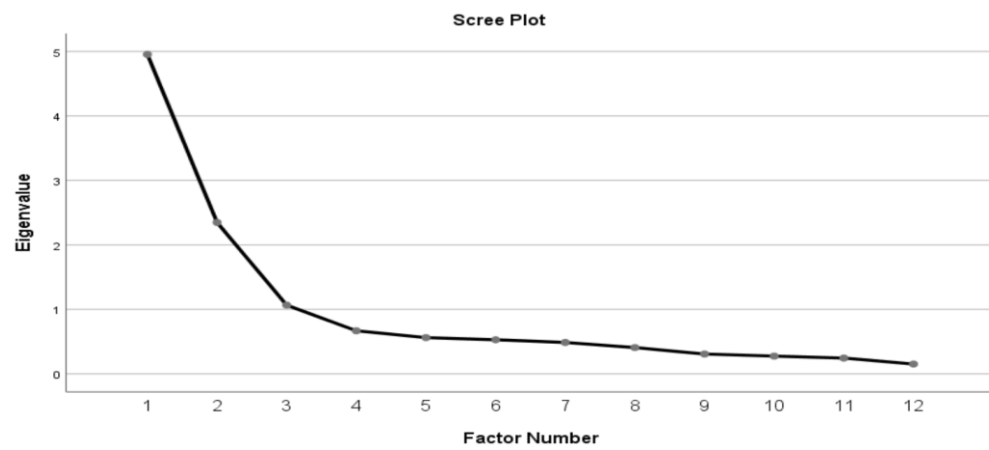

**Figure S1.** Scree plot for the Psychological Need Thwarting of Online Teaching Scale, illustrating the best fit for three factors.

**Table S2.** LISREL syntax for the proposed model.

---

DA NI=29 NO=9030 MA=PM  
PM SY FI=1218\_FOUR.PM  
ACM SY FI=1218\_FOUR.ACM  
MO NY=13 NE=3 NK=6 NX=16 LX=FU, FI TD=SY, FI LY=FU, FI BE=FU, FI GA=FU, FI  
FR LY 2 1 LY 3 1  
FR LY 5 2 LY 6 2 LY 7 2 LY 8 2 LY 9 2 LY 10 2  
FR LY 12 3 LY 13 3  
FR LX 2 1 LX 3 1 LX 4 1 LX 5 1 LX 6 1  
FR LX 8 2 LX 9 2 LX 10 2 LX 11 2 LX 12 2  
VA 1 LY 1 1  
VA 1 LY 4 2  
VA 1 LY 11 3  
VA 1 LX 1 1  
VA 1 LX 7 2  
VA 1 LX 13 3  
VA 1 LX 14 4  
VA 1 LX 15 5  
VA 1 LX 16 6  
FR TD 1 1 TD 2 2 TD 3 3 TD 4 4 TD 5 5 TD 6 6 TD 7 7 TD 8 8 TD 9 9 TD 10 10 TD 11 11 TD 12  
12  
VA 0 TD 13 13 TD 14 14 TD 15 15 TD 16 16  
FR GA 2 1  
FR GA 2 2  
FR GA 1 3 GA 1 4 GA 1 5 GA 1 6  
FR BE 1 2  
FR BE 1 3  
FR BE 3 2  
LK  
BSMAS SABAS WORKINGYEAR P\_ONLINETEACHING\_EXPERIENCE  
HOMEROOMTEACHER GENDER  
LE  
DASS FEAR PNT  
PD  
OU ME=DWLS SS SC ND=3

---
